# Supplementary material for: Comparative study of the ability of green synthesized Se-NPs and CTS-NPs to overcome drought stress in Oryza sativa L. for regenerative nanoengineering in agriculture
Source: Royal Society of Chemistry journal article supplement (doi:10.1039/d4nj04880f), 2025-01-01
Supplement: d4nj04880f1.pdf [file d4nj04880f1.pdf]

## **Comparative Study of Green Synthesized Se-NPs and CTS- NPs to Sustain drought Stress in *Oryza sativa* L toward regenerative nanoengineering in agriculture**

Muhammad Faheem Iqbal<sup>1,2</sup>, Iqra Irshad<sup>1,2</sup>, Iftikhar Ahmed<sup>3\*</sup>, Shafiq Ahmad<sup>4</sup>, Muhammad Uzair<sup>2,\*</sup>, Rehana Kausar<sup>5</sup>, Muhammad Ramzan Khan<sup>2</sup>, Murtaza Hasan<sup>6\*</sup>, Ghazala Mustafa<sup>1\*</sup>

<sup>1</sup>Department of Plant Sciences, Faculty of Biological Sciences, Quaid-i-Azam University, Islamabad 45320, Pakistan.

<sup>2</sup>National Institute for Genomics and Advanced Biotechnology (NIGAB), National Agricultural Research Centre (NARC), Park Road, Islamabad-45500, Pakistan.

<sup>3</sup>Environmental and Public Health Department, College of Health Science, Abu Dhabi 11 University P.O. Box 59911 Abu Dhabi, United Arab Emirates

<sup>4</sup>Industrial Engineering Department, College of Engineering, King Saud University, P.O. Box 13 800 Riyadh, 11421, Saudia Arabia

<sup>5</sup>Department of Botany, University of Azad Jammu and Kashmir, Muzaffarabad, 13100, Pakistan

<sup>6</sup>Department of Biotechnology, Faculty of Chemical and Biological Sciences, The Islamia University of Bahawalpur, Bahawalpur 63100, Pakistan

### **\* Corresponding Author:**

Ghazala Mustafa, Department of Plant Sciences, Faculty of Biological Sciences, Quaid-i-Azam University, Islamabad 45320, Pakistan. Tel: +92-51-90643187,

**Email: [mghazala@qau.edu.pk](mailto:mghazala@qau.edu.pk)**

Murtaza Hasan, Department of Biotechnology, Faculty of Chemical and Biological Sciences, The Islamia University of Bahawalpur, Bahawalpur 63100, Pakistan.

**Email: [murtaza@iub.edu.pk](mailto:murtaza@iub.edu.pk)**

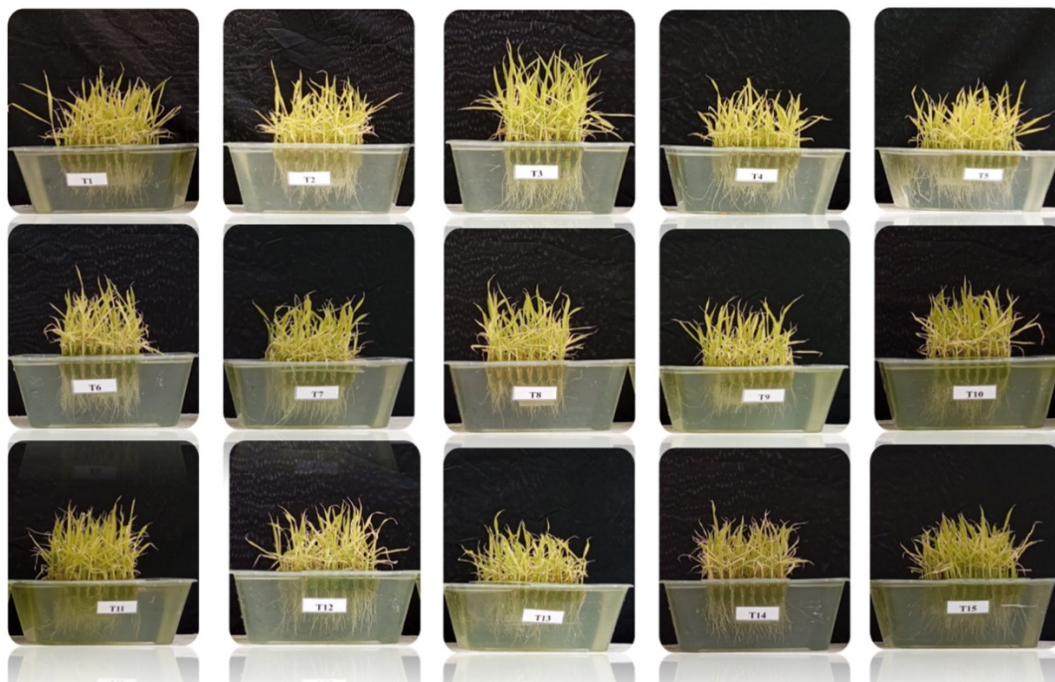

**Figure S0.** Different plant treatments, growing under hydroponic system, before harvesting

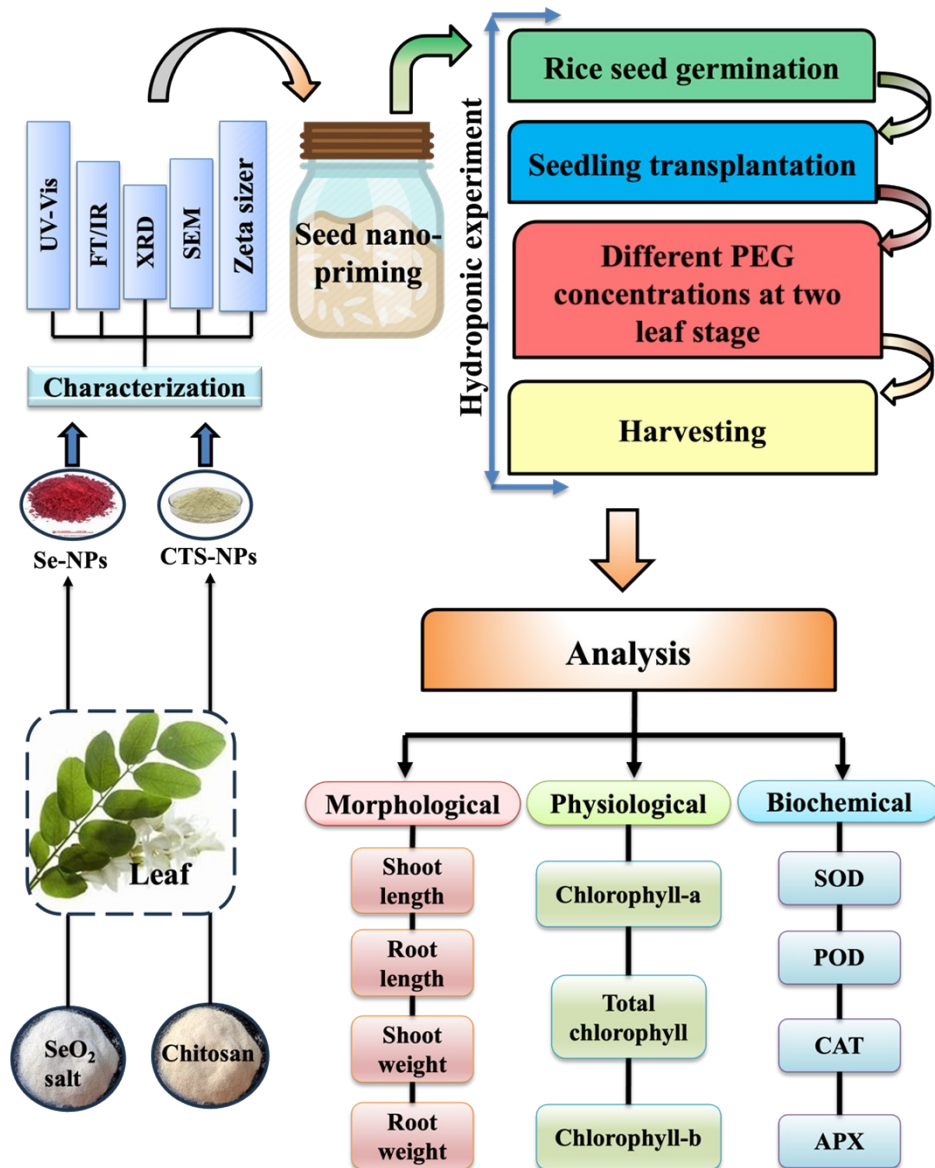

Figure S1. Complete study design and its application

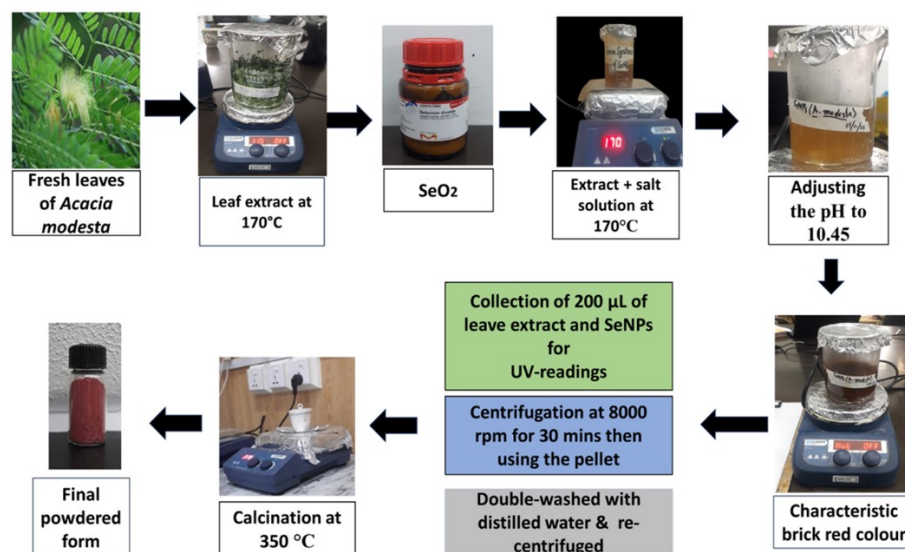

**Figure S2.** Green synthesis of Se-NPs using *A. modesta* leaf extracts.

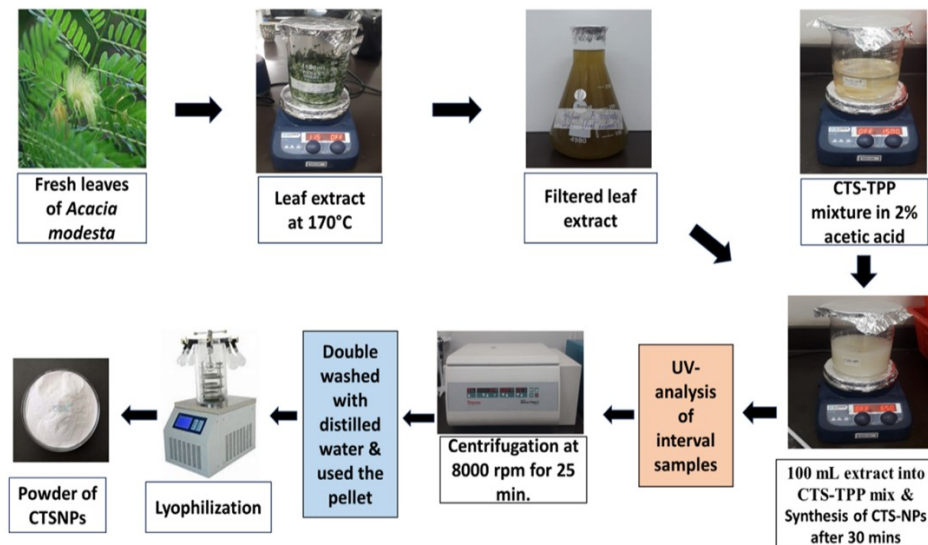

**Figure S3.** Green synthesis of CTS-NPs using *A. modesta* leaf extracts.

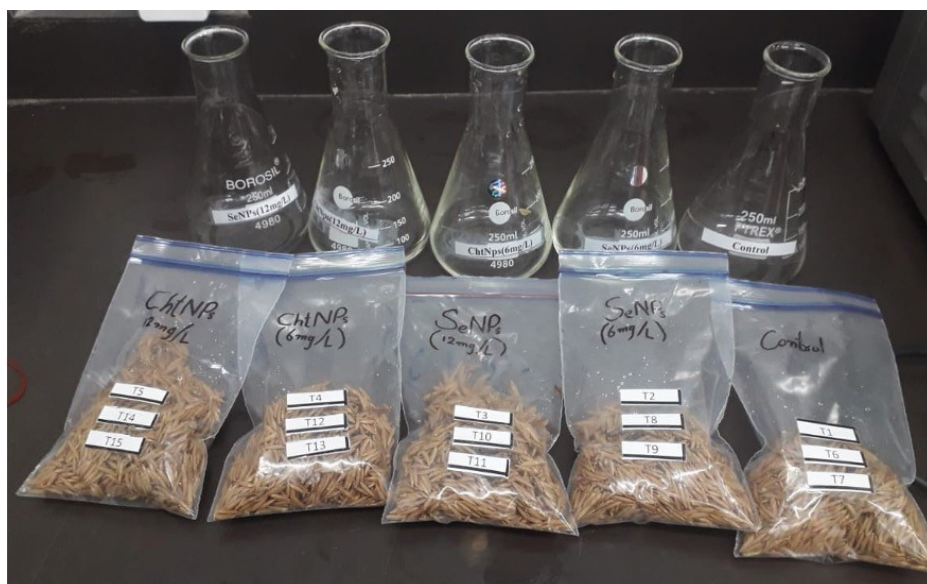

**Figure S4.** Seed primed with Se-NPs and CTS-NPs were preserved in zipper bags at  $-4^{\circ}\text{C}$

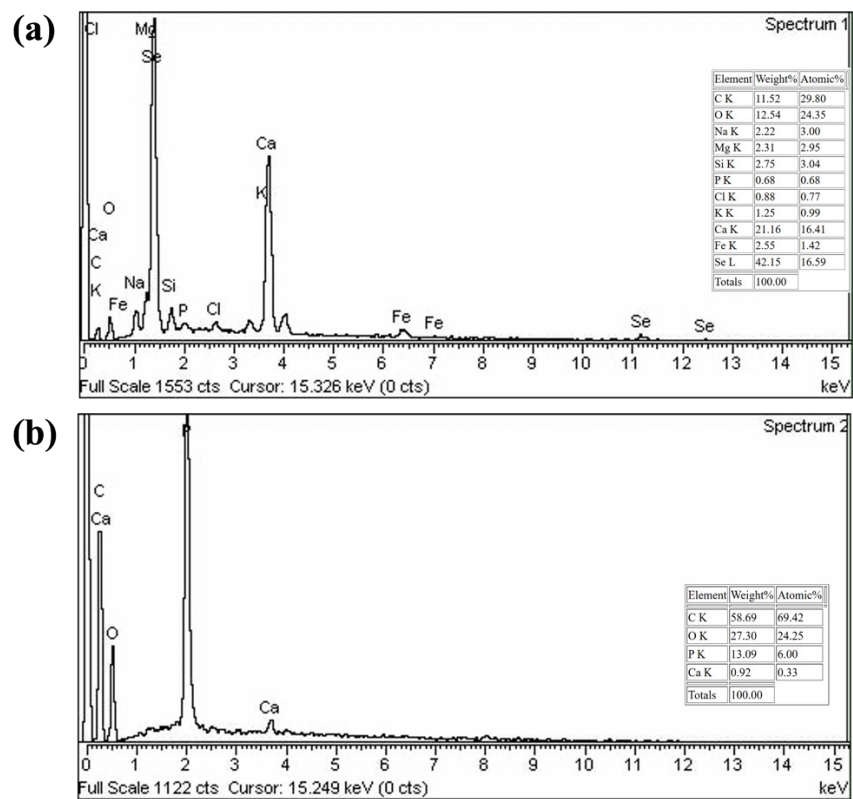

**Figure S5.** EDX analysis produced by leaf extracts of *Acacia modesta* (a) for Se-NPs (b) for CTS-NPs

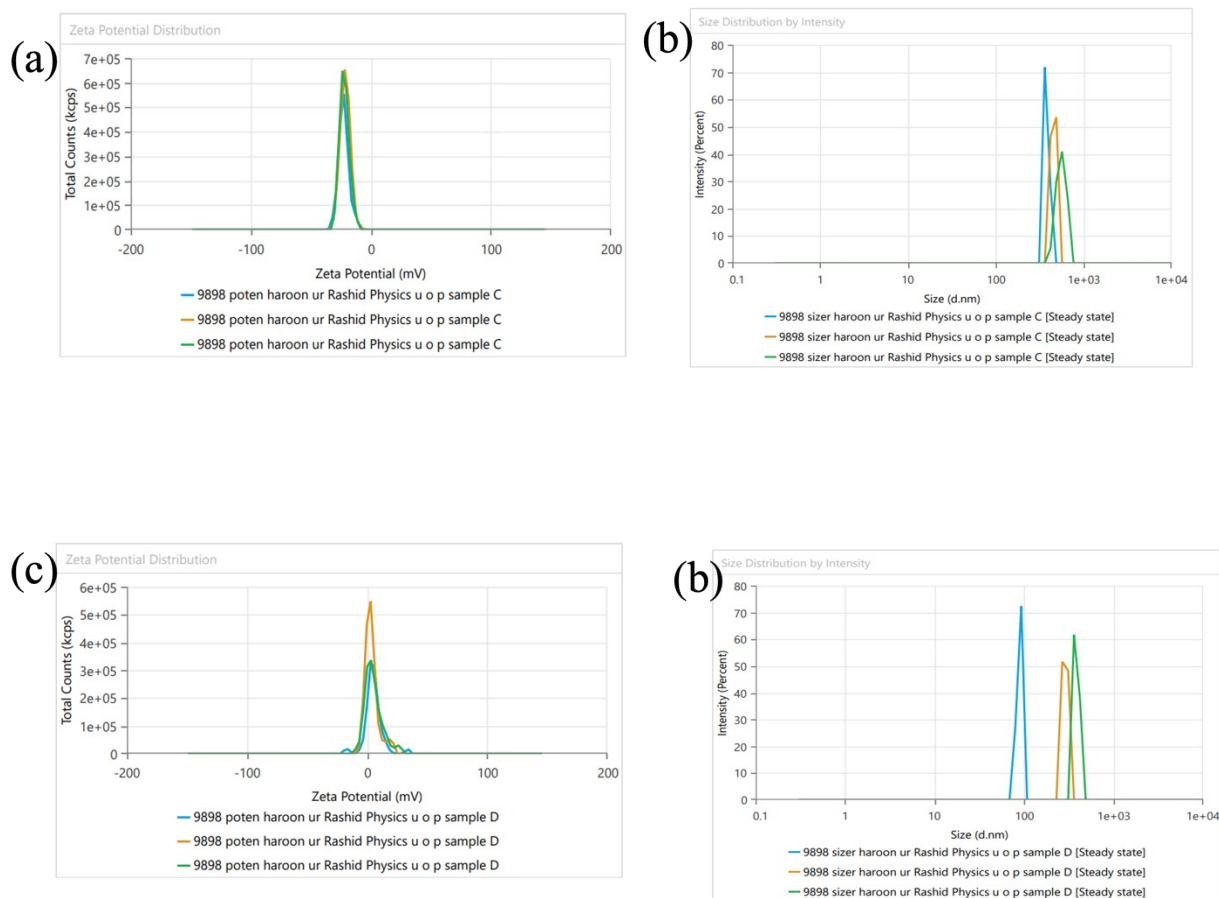

**Figure S6.** Zeta potentials and zeta sizes of Se-NPs (a), (b) and CTS-NPs (c), (d), produced by leaf extracts of *Acacia modesta*
